# Supplementary material
Source: PubMed Central journal article supplement (PMC6007973)

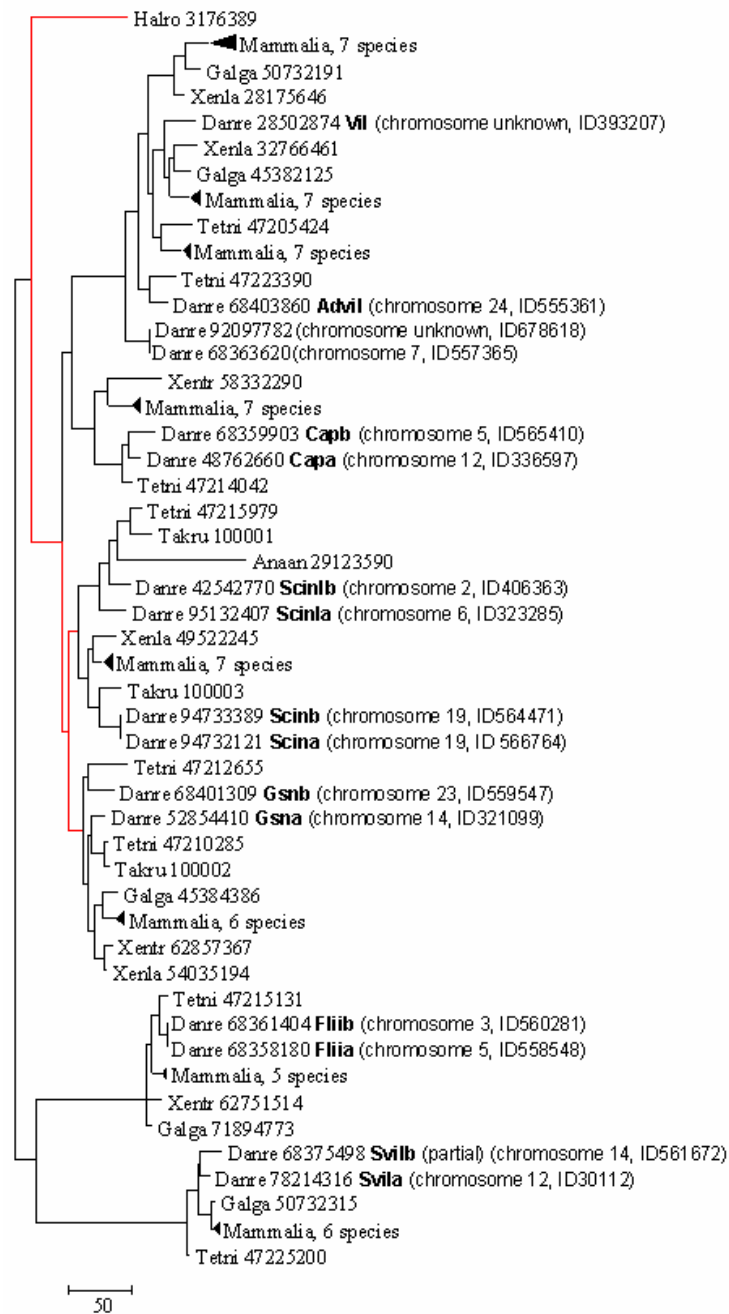

**Supplementary Fig 1**

Supplement: NIHMS973774-supplement-Supplementary_Figure_1.pdf [file NIHMS973774-supplement-Supplementary_Figure_1.pdf]
